# Supplementary material
Source: publisher figshare collection journal article supplement (https://frontiersin.figshare.com/ndownloader/files/14392985)
Supplement: Supplementary file 1 [file 14392985]

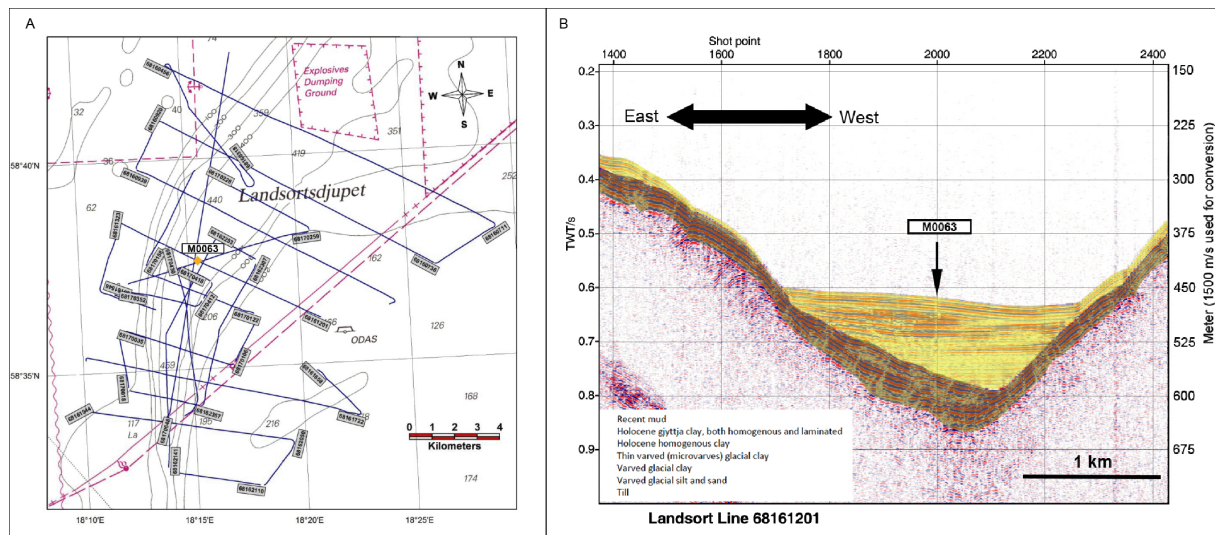

**Supplementary Figure 1. A)** Track plot of seismic survey lines in the Landsort Deep around Site M0063 (yellow diamond). Distance between isobaths is 100 m. ODAS = Oceanographic Data Acquisition Systems. **B)** Close-up of transect along seismic Line 68161201, crossing Site M0063, with original interpretation of seismic signals. TWT = two-way travelttime. Figure from Andren et al., 2015.
